# Supplementary material for: Cumulative Update of a Systematic Overview Evaluating Interventions Addressing Polypharmacy
Source: PubMed Central journal article supplement (PMC10782233; doi:10.1001/jamanetworkopen.2023.50963), 2024-01-10
Supplement: jamanetwopen-e2350963-s001.pdf [file jamanetwopen-e2350963-s001.pdf]

## Supplementary Online Content

Keller MS, Qureshi N, Mays A, Sarkisian C, Pevnick J. Cumulative update of a systematic overview evaluating interventions addressing polypharmacy. *JAMA Netw Open*. 2024;7(1):e2350963. doi:10.1001/jamanetworkopen.2023.50963

**eAppendix 1.** Full Search Strategy for Updated Systematic Overview of Systematic Reviews Evaluating Interventions Addressing Polypharmacy

**eAppendix 2.** Selection Strategy

**eAppendix 3.** Standardized Abstraction Form for Updated Systematic Overview of Systematic Reviews Evaluating Interventions Addressing Polypharmacy

**eTable 1.** AMSTAR2 Scores for Systematic Reviews of Studies Examining Polypharmacy Interventions

**eTable 2.** Intervention Types by Systematic Review

**eTable 3.** Citation Matrix

### **eReferences**

This supplementary material has been provided by the authors to give readers additional information about their work.

*eAppendix 1. Full search strategy for updated systematic overview of systematic reviews evaluating interventions addressing polypharmacy*

PubMed search strategy:

(("2017"[Date - Publication] : "3000"[Date - Publication]) AND english[Language])

AND

("Systematic Review"[ti] OR "Systematic Review"[tiab] OR "health technology assessment"[tiab] OR

"metaanalysis"[tiab] OR "meta-analysis"[tiab] OR "Systematic Review"[Publication Type])

AND

((polypharmacy[tiab] OR deprescribing[tiab] OR deprescriptions[MeSH Terms] OR polypharmacy[MeSH

Terms] OR "potentially inappropriate medication list"[MeSH Terms] OR "inappropriate prescribing"[MeSH

Terms]) AND (intervention\* or program\* or monitor\* or tool\*[tiab])) AND #1 AND #2)

Cochrane database search strategy:

#1 "polypharmacy":ti,ab,kw OR "deprescribing":ti,ab,kw Publication Year from 2017 to 2022

DARE search strategy:

(polypharmacy) IN DARE FROM 2017 TO 2022

## *eAppendix 2: Selection strategy*

Similar to a previously published systematic overview,<sup>1</sup> we considered an SR to be a summary of outcomes resulting from a detailed and comprehensive plan and search strategy for relevant evidence derived *a priori*. We included SRs of studies with any study design (e.g., randomized clinical trials and observational studies) and outcome. SRs were included if they included a definition of polypharmacy or “polypharmacy” in the search criteria. We included SRs regardless of setting (e.g., inpatient, outpatient, nursing home) or population (e.g., frail older adults, patients with specific chronic diseases).

Exclusion criteria: We excluded SRs focusing exclusively on interventions implemented in low- to middle-income countries, where the average annual income level is under \$14,000,<sup>2</sup> due to differences in care practices and healthcare infrastructure. We excluded SRs focused on antibiotic stewardship, solely about inappropriate prescribing, or medication adherence, as we felt these topics merited separate systematic overviews. Finally, we excluded SRs focused on interventions aimed at reducing or managing only one medication class (e.g., benzodiazepines, proton pump inhibitors), as we considered these to be outside of the scope of polypharmacy-related interventions. This resulted in a more focused systematic overview compared to the previously published paper.<sup>1</sup>

*eAppendix 3: Standardized abstraction form for updated systematic overview of systematic reviews evaluating interventions addressing polypharmacy.*

|                         |                                                                                                                                                                                                                    |
|-------------------------|--------------------------------------------------------------------------------------------------------------------------------------------------------------------------------------------------------------------|
| Article Data            | Article ID                                                                                                                                                                                                         |
|                         | Abstractor                                                                                                                                                                                                         |
|                         | Authors                                                                                                                                                                                                            |
|                         | First Author Last Name                                                                                                                                                                                             |
|                         | Year                                                                                                                                                                                                               |
|                         | Title                                                                                                                                                                                                              |
|                         | Abstract                                                                                                                                                                                                           |
| AMSTAR2<br>(1 or 0)     | 1. Did the research questions and inclusion criteria for the review include the components of PICO?                                                                                                                |
|                         | 2. Did the report of the review contain an explicit statement that the review methods were established prior to the conduct of the review and did the report justify any significant deviations from the protocol? |
|                         | 3. Did the review authors explain their selection of the study designs for inclusion in the review?                                                                                                                |
|                         | 4. Did the review authors use a comprehensive literature search strategy?                                                                                                                                          |
|                         | 5. Did the review authors perform study selection in duplicate?                                                                                                                                                    |
|                         | 6. Did the review authors perform data extraction in duplicate?                                                                                                                                                    |
|                         | 7. Did the review authors provide a list of excluded studies and justify the exclusions?                                                                                                                           |
|                         | 8. Did the review authors describe the included studies in adequate detail?                                                                                                                                        |
|                         | 9. Did the review authors use a satisfactory technique for assessing the risk of bias (RoB) in individual studies that were included in the review?                                                                |
|                         | 10. Did the review authors report on the sources of funding for the studies included in the review?                                                                                                                |
|                         | 11. If meta-analysis was performed, did the review authors use appropriate methods for statistical combination of results?                                                                                         |
|                         | 12. If meta-analysis was performed, did the review authors assess the potential impact of RoB in individual studies on the results of the meta-analysis or other evidence synthesis?                               |
|                         | 13. Did the review authors account for RoB in primary studies when interpreting/discussing the results of the review?                                                                                              |
|                         | 14. Did the review authors provide a satisfactory explanation for, and discussion of, any heterogeneity observed in the results of the review?                                                                     |
|                         | 15. If they performed quantitative synthesis did the review authors carry out an adequate investigation of publication bias (small study bias) and discuss its likely impact on the results of the review?         |
|                         | 16. Did the review authors report any potential sources of conflict of interest, including any funding they received for conducting the review?                                                                    |
|                         | SUM AMSTAR2                                                                                                                                                                                                        |
| Study Data              | Objective                                                                                                                                                                                                          |
|                         | Number included studies                                                                                                                                                                                            |
|                         | Number and types of studies (RCT and non-RCT)                                                                                                                                                                      |
|                         | Intervention type(s)                                                                                                                                                                                               |
|                         | Description of Interventions?                                                                                                                                                                                      |
|                         | Intervention target (pharmacist, physician, patient, other?)                                                                                                                                                       |
|                         | Single versus multi-component interventions                                                                                                                                                                        |
|                         | <b>Study (changed from patient) population(s)</b>                                                                                                                                                                  |
|                         | Analyses of subpopulation(s)                                                                                                                                                                                       |
|                         | Setting(s)                                                                                                                                                                                                         |
|                         | Primary outcome measure(s)                                                                                                                                                                                         |
|                         | Presence of meta-analytic techniques and any pooled estimates                                                                                                                                                      |
|                         | Major conclusions regarding intervention effectiveness                                                                                                                                                             |
| Outcomes<br>by Category | (1) a positive association between intervention strategy and outcome                                                                                                                                               |
|                         | (2) a negative association between intervention strategy and outcome                                                                                                                                               |
|                         | (3) a null association between intervention strategy and outcome                                                                                                                                                   |
|                         | (4) preclusion from drawing conclusions due to limited or low-quality studies                                                                                                                                      |
|                         | (5) mixed results                                                                                                                                                                                                  |
| Quality                 | GRADE Score                                                                                                                                                                                                        |

eTable 1. AMSTAR2 scores for systematic reviews of studies examining polypharmacy interventions.

| Systematic Review Author and Date                                                                                                                                                                                  | Johansson <i>et al</i> (2016) | Page <i>et al</i> (2016) | Thillainadesan <i>et al</i> (2018) | Rankin <i>et al</i> (2018) | Mizokami <i>et al</i> (2019) | Ali <i>et al</i> (2020) | Lum <i>et al</i> (2020) | Hasan Ibrahim <i>et al</i> (2021) | Laberge <i>et al</i> (2021) | Lee <i>et al</i> (2021) | Tasai <i>et al</i> (2021) | O'Shea <i>et al</i> (2022) | Reeve <i>et al</i> (2022) | Stozner <i>et al</i> (2022) |
|--------------------------------------------------------------------------------------------------------------------------------------------------------------------------------------------------------------------|-------------------------------|--------------------------|------------------------------------|----------------------------|------------------------------|-------------------------|-------------------------|-----------------------------------|-----------------------------|-------------------------|---------------------------|----------------------------|---------------------------|-----------------------------|
| 1. Did the research questions and inclusion criteria for the review include the components of PICO?                                                                                                                | 1                             | 1                        | 1                                  | 1                          | 1                            | 1                       | 1                       | 1                                 | 1                           | 1                       | 1                         | 1                          | 1                         | 1                           |
| 2. Did the report of the review contain an explicit statement that the review methods were established prior to the conduct of the review and did the report justify any significant deviations from the protocol? | 1                             | 1                        | 1                                  | 1                          | 1                            | 1                       | 0                       | 1                                 | 0                           | 1                       | 0                         | 1                          | 1                         | 1                           |
| 3. Did the review authors explain their selection of the study designs for inclusion in the review?                                                                                                                | 1                             | 1                        | 0                                  | 0                          | 0                            | 0                       | 0                       | 0                                 | 1                           | 1                       | 0                         | 1                          | 1                         | 1                           |
| 4. Did the review authors use a comprehensive literature search strategy?                                                                                                                                          | 1                             | 1                        | 1                                  | 1                          | 1                            | 1                       | 1                       | 1                                 | 1                           | 1                       | 1                         | 1                          | 1                         | 1                           |
| 5. Did the review authors perform study selection in duplicate?                                                                                                                                                    | 1                             | 1                        | 1                                  | 1                          | 1                            | 0                       | 1                       | 1                                 | 1                           | 1                       | 1                         | 1                          | 1                         | 1                           |
| 6. Did the review authors perform data extraction in duplicate?                                                                                                                                                    | 1                             | 1                        | 0                                  | 1                          | 1                            | 0                       | 1                       | 1                                 | 1                           | 1                       | 1                         | 1                          | 1                         | 1                           |
| 7. Did the review authors provide a list of excluded studies and justify the exclusions?                                                                                                                           | 1                             | 0                        | 0                                  | 1                          | 0                            | 0                       | 0                       | 1                                 | 0                           | 1                       | 0                         | 0                          | 1                         | 0                           |
| 8. Did the review authors describe the included studies in adequate detail?                                                                                                                                        | 1                             | 1                        | 1                                  | 1                          | 1                            | 1                       | 1                       | 1                                 | 1                           | 1                       | 1                         | 1                          | 1                         | 1                           |
| 9. Did the review authors use a satisfactory technique for assessing the risk of bias (RoB) in individual studies that were included in the review?                                                                | 1                             | 1                        | 1                                  | 1                          | 1                            | 1                       | 1                       | 1                                 | 1                           | 1                       | 1                         | 1                          | 0                         | 1                           |
| 10. Did the review authors report on the sources of funding for the studies included in the review?                                                                                                                | 0                             | 1                        | 0                                  | 0                          | 0                            | 0                       | 0                       | 0                                 | 0                           | 0                       | 0                         | 0                          | 0                         | 0                           |
| 11. If meta-analysis was performed, did the review authors use appropriate methods for statistical combination of results?                                                                                         | 1                             | 1                        | NA                                 | 1                          | 1                            | 1                       | NA                      | NA                                | NA                          | 1                       | 1                         | NA                         | NA                        | NA                          |

|                                                                                                                                                                                                            |    |    |    |    |    |    |    |    |    |    |   |    |    |    |
|------------------------------------------------------------------------------------------------------------------------------------------------------------------------------------------------------------|----|----|----|----|----|----|----|----|----|----|---|----|----|----|
| 12. If meta-analysis was performed, did the review authors assess the potential impact of RoB in individual studies on the results of the meta-analysis or other evidence synthesis?                       | 1  | 1  | NA | 1  | 0  | 1  | NA | NA | NA | 1  | 0 | NA | NA | NA |
| 13. Did the review authors account for RoB in primary studies when interpreting/discussing the results of the review?                                                                                      | 1  | 1  | 1  | 1  | 0  | 1  | 0  | 1  | 0  | 1  | 0 | 0  | 0  | 0  |
| 14. Did the review authors provide a satisfactory explanation for, and discussion of, any heterogeneity observed in the results of the review?                                                             | 1  | 1  | 1  | 1  | 1  | 1  | 0  | 0  | 0  | 1  | 1 | 1  | 1  | 1  |
| 15. If they performed quantitative synthesis did the review authors carry out an adequate investigation of publication bias (small study bias) and discuss its likely impact on the results of the review? | 1  | 1  | NA | 1  | 0  | 0  | NA | NA | NA | 1  | 0 | NA | NA | NA |
| 16. Did the review authors report any potential sources of conflict of interest, including any funding they received for conducting the review?                                                            | 1  | 1  | 1  | 1  | 1  | 1  | 1  | 1  | 1  | 1  | 1 | 0  | 1  | 1  |
| SUM AMSTAR2                                                                                                                                                                                                | 15 | 15 | 9  | 14 | 10 | 10 | 7  | 10 | 8  | 15 | 9 | 9  | 10 | 10 |

Notes: AMSTAR2: A Measurement Tool to Assess Systematic Reviews

eTable 2. Intervention types by systematic review.

| Systematic Review Author and Date         | Johansson <i>et al</i> (2016)                                                                                                             | Page <i>et al</i> (2016) | Thillainadesan <i>et al</i> (2018) | Rankin <i>et al</i> (2018) | Mizokami <i>et al</i> (2019)                                                                                                                                                                                                                                                                                                           | Ali <i>et al</i> (2020) | Lum <i>et al</i> (2020)                           | Hasan Ibrahim <i>et al</i> (2021)                       | Laberge <i>et al</i> (2021) | Lee <i>et al</i> (2021) | Tasai <i>et al</i> (2021) | O'Shea <i>et al</i> (2022) | Reeve <i>et al</i> (2022) | Stozner <i>et al</i> (2022)                                    |
|-------------------------------------------|-------------------------------------------------------------------------------------------------------------------------------------------|--------------------------|------------------------------------|----------------------------|----------------------------------------------------------------------------------------------------------------------------------------------------------------------------------------------------------------------------------------------------------------------------------------------------------------------------------------|-------------------------|---------------------------------------------------|---------------------------------------------------------|-----------------------------|-------------------------|---------------------------|----------------------------|---------------------------|----------------------------------------------------------------|
| Pharmacist-led medication reviews         | 13 studies (3 studies implemented compliance-improving strategies, 3 studies included discussions with patients about medication changes) | 2 studies                | 4 studies                          | 17 studies                 | 9 (2 studies included Type I CMR, which involves a prescription review only, 3 studies included a Type II CMR, which includes a prescription review and a medication adherence review, 4 studies included a Type III CMR, which includes the Type II elements and a face-to-face review of medicines and conditions with the patient.) |                         | 5 studies (some which included patient education) | 5 studies                                               | 10 studies                  |                         |                           |                            |                           |                                                                |
| Physician-led medication reviews          | 3 studies                                                                                                                                 | 11 studies               | 4 studies                          | 5 studies                  |                                                                                                                                                                                                                                                                                                                                        |                         |                                                   |                                                         |                             |                         |                           |                            | 2 studies                 | 11 studies                                                     |
| Nurse-led medication reviews              |                                                                                                                                           | 1 study                  |                                    | 3 studies                  |                                                                                                                                                                                                                                                                                                                                        |                         |                                                   | 2 studies (delivered in collaboration with pharmacists) |                             |                         |                           |                            |                           |                                                                |
| Medication review (unspecified deliverer) |                                                                                                                                           |                          |                                    |                            |                                                                                                                                                                                                                                                                                                                                        | 4 studies               |                                                   |                                                         |                             |                         |                           |                            |                           | 44 studies (36 studies used a comprehensive medication review) |

|                                             |                                                              |           |         |                                                                                  |           |         |  |            |            |
|---------------------------------------------|--------------------------------------------------------------|-----------|---------|----------------------------------------------------------------------------------|-----------|---------|--|------------|------------|
| Multi-disciplinary team-led interventions   | (1 study included medication changes related to the patient) | 4 studies | 1 study |                                                                                  | 1 study   | 1 study |  | 4 studies  |            |
| Geriatric assessment and screening          |                                                              |           |         |                                                                                  | 2 studies |         |  |            |            |
| Educational programs to reduce polypharmacy | 4 studies also included patient education                    | 3 studies |         | 4 studies included patient education, 10 studies included education to providers |           | 1 study |  |            |            |
| Complex, multi-faceted interventions        |                                                              |           |         | 31 studies (including computerized decision support)                             |           |         |  |            |            |
| Pharmacogenetic interventions               |                                                              |           |         |                                                                                  |           | 1 study |  | 12 studies |            |
| Shared decision making/patient involvement  |                                                              |           |         |                                                                                  |           |         |  | 17 studies | 16 studies |



eTable 3. Citation matrix

| Systematic Review Author and Date | Johansson <i>et al</i> (2016) | Page <i>et al</i> (2016) | Thillainadesan <i>et al</i> (2018) | Rankin <i>et al</i> (2018) | Mizokami <i>et al</i> (2019) | Ali <i>et al</i> (2020) | Lum <i>et al</i> (2020) | Hasan Ibrahim <i>et al</i> (2021) | Laberge <i>et al</i> (2021) | Lee <i>et al</i> (2021) | Tasai <i>et al</i> (2021) | O'Shea <i>et al</i> (2022) | Reeve <i>et al</i> (2022) | Stozner <i>et al</i> (2022) |
|-----------------------------------|-------------------------------|--------------------------|------------------------------------|----------------------------|------------------------------|-------------------------|-------------------------|-----------------------------------|-----------------------------|-------------------------|---------------------------|----------------------------|---------------------------|-----------------------------|
| Abdool 2019                       |                               |                          |                                    |                            |                              |                         |                         |                                   |                             |                         |                           |                            |                           | X                           |
| Ailabouni 2019                    |                               |                          |                                    |                            |                              |                         |                         |                                   |                             |                         |                           |                            |                           | X                           |
| Allard 2001                       | X                             | X                        |                                    |                            |                              |                         |                         |                                   |                             |                         |                           |                            |                           |                             |
| Avorn 1992                        |                               |                          |                                    |                            |                              |                         |                         |                                   |                             |                         |                           |                            |                           | X                           |
| Baqir 2014                        |                               |                          |                                    |                            |                              |                         |                         |                                   |                             |                         |                           |                            |                           | X                           |
| Basger 2015                       |                               |                          |                                    | X                          |                              |                         |                         |                                   |                             |                         |                           |                            |                           |                             |
| Beer 2011                         |                               | X                        |                                    |                            |                              |                         |                         |                                   |                             |                         |                           |                            |                           |                             |
| Bernsten 2001                     | X                             |                          |                                    |                            |                              |                         |                         |                                   |                             |                         | X                         |                            |                           |                             |
| Bladh 2011                        |                               |                          | X                                  | X                          |                              |                         |                         |                                   |                             |                         |                           |                            |                           |                             |
| Blalock 2010                      |                               |                          |                                    |                            |                              | X                       |                         |                                   |                             | X                       |                           |                            |                           |                             |
| Blenke 2018                       |                               |                          |                                    |                            |                              |                         |                         |                                   |                             |                         |                           |                            |                           | X                           |
| Boersma 2019                      |                               |                          |                                    |                            |                              |                         |                         |                                   |                             |                         |                           |                            | X                         |                             |
| Boyé 2017                         |                               |                          |                                    |                            |                              |                         |                         |                                   |                             | X                       |                           |                            |                           |                             |
| Bregnhøj 2009                     | X                             |                          |                                    |                            |                              |                         |                         |                                   |                             |                         |                           |                            |                           |                             |
| Briggs 2015                       |                               |                          |                                    |                            | X                            |                         |                         |                                   |                             |                         |                           |                            |                           |                             |
| Brixner 2016                      |                               |                          |                                    |                            |                              |                         |                         |                                   | X                           |                         |                           | X                          |                           |                             |
| Brophy 2014                       |                               |                          |                                    |                            |                              |                         |                         |                                   |                             |                         |                           |                            |                           |                             |
| Brulhart 2011                     |                               |                          |                                    |                            |                              |                         |                         |                                   |                             |                         |                           |                            |                           | X                           |
| Bryant 2011                       |                               |                          |                                    |                            |                              |                         |                         |                                   |                             |                         | X                         |                            |                           |                             |
| Bucci 2003                        |                               |                          |                                    | X                          |                              |                         |                         |                                   |                             |                         |                           |                            |                           |                             |
| Caffiero 2017                     |                               |                          |                                    |                            |                              |                         |                         |                                   |                             |                         |                           |                            | X                         |                             |
| Calbelguenne 2019                 |                               |                          |                                    |                            |                              |                         |                         |                                   |                             |                         |                           |                            |                           | X                           |
| Campbell 1999                     |                               | X                        |                                    |                            |                              | X                       |                         |                                   |                             | X                       |                           |                            |                           |                             |
| Campins 2017                      |                               |                          |                                    | X                          |                              |                         |                         | X                                 | X                           |                         |                           |                            | X                         |                             |
| Casper 2019                       |                               |                          |                                    |                            |                              |                         | X                       |                                   |                             |                         |                           |                            |                           |                             |
| Chan 2009                         |                               |                          |                                    |                            |                              |                         |                         |                                   |                             |                         |                           |                            |                           | X                           |
| Chiarelli 2020                    |                               |                          |                                    |                            |                              |                         |                         |                                   |                             |                         |                           |                            | X                         |                             |
| Chiu 2018                         |                               |                          |                                    | X                          |                              |                         |                         |                                   |                             |                         |                           |                            |                           |                             |
| Christensen 2004                  |                               |                          |                                    |                            |                              |                         |                         |                                   |                             |                         |                           |                            |                           | X                           |
| Claesson 1998                     | X                             |                          |                                    |                            |                              |                         |                         |                                   |                             |                         |                           |                            |                           |                             |
| Clyne 2015                        |                               |                          |                                    | X                          |                              |                         |                         |                                   |                             |                         |                           |                            |                           |                             |
| Cool 2018                         |                               |                          |                                    |                            |                              |                         |                         |                                   |                             |                         |                           |                            |                           | X                           |
| Craig 1984                        |                               |                          |                                    |                            |                              |                         |                         |                                   |                             |                         |                           |                            |                           | X                           |
| Crotty 2004a                      | X                             |                          |                                    | X                          |                              |                         |                         |                                   |                             |                         |                           |                            |                           | X                           |
| Crotty 2004b                      |                               |                          |                                    | X                          |                              |                         |                         |                                   |                             |                         |                           |                            |                           |                             |
| Curtin 2020                       |                               |                          |                                    |                            |                              |                         |                         |                                   |                             |                         |                           |                            | X                         |                             |
| Dahl 2008                         |                               |                          |                                    |                            |                              |                         |                         |                                   |                             |                         |                           |                            |                           | X                           |
| Dalleur 2014                      |                               | X                        | X                                  | X                          |                              |                         |                         |                                   |                             |                         |                           |                            |                           |                             |
| Davidsson 2011                    |                               |                          |                                    |                            |                              |                         |                         |                                   |                             |                         |                           |                            |                           | X                           |
| Denneboom 2007                    |                               |                          |                                    |                            |                              |                         |                         |                                   | X                           |                         |                           |                            |                           |                             |
| Elliott 2017                      |                               |                          |                                    |                            |                              |                         |                         |                                   |                             |                         |                           | X                          |                           |                             |
| Ewan 2001                         |                               |                          |                                    |                            |                              |                         |                         |                                   |                             |                         |                           |                            |                           | X                           |
| Finkelstein 2016a                 |                               |                          |                                    |                            |                              |                         |                         |                                   |                             |                         |                           | X                          |                           |                             |
| Finkelstein 2016b                 |                               |                          |                                    |                            |                              |                         |                         |                                   |                             |                         |                           | X                          |                           |                             |
| Finkers 2007                      |                               |                          |                                    |                            |                              |                         |                         |                                   |                             |                         |                           |                            |                           | X                           |
| Fog 2017                          |                               |                          |                                    |                            |                              |                         |                         |                                   |                             |                         |                           |                            |                           | X                           |
| Foubert 2020                      |                               |                          |                                    |                            |                              |                         |                         |                                   |                             |                         |                           |                            |                           | X                           |
| Franchi 2016                      |                               |                          |                                    | X                          |                              |                         |                         |                                   |                             |                         |                           |                            |                           |                             |





|                     |   |   |   |   |   |   |   |   |
|---------------------|---|---|---|---|---|---|---|---|
| van der Linden 2017 |   |   | X | X |   |   |   |   |
| van der Meer 2018   |   |   |   |   | X |   |   |   |
| van der Spek 2018   |   |   |   |   |   |   |   | X |
| van der Velde 2007  |   | X |   |   | X |   |   |   |
| Van der Wouden 2019 |   |   |   |   |   | X |   |   |
| van Summeren 2017   |   |   |   |   |   |   | X |   |
| Verrue 2012         |   |   |   |   |   |   |   | X |
| Vinks 2009          | X |   |   |   |   |   |   | X |
| Watson 2014         |   |   |   |   |   |   |   | X |
| Weber 2008          |   | X |   |   | X |   |   |   |
| Weber 2007          | X |   |   |   |   |   |   |   |
| Wehling 2016        |   |   | X | X |   |   |   |   |
| Westbury 2010       |   |   |   |   |   |   |   | X |
| Wilchesky 2018      |   |   |   |   |   |   |   | X |
| Williams 2004       | X |   |   |   |   |   |   |   |
| Wolf 2015           |   |   |   |   |   |   |   | X |
| Wouters 2017        |   |   |   |   |   |   |   | X |
| Yeh 2013            |   | X |   |   |   |   |   |   |
| Zaal 2016           |   |   |   |   |   |   |   | X |
| Zechmann 2019       |   |   |   |   |   |   | X |   |
| Zermansky 2006      | X |   |   |   |   | X |   | X |

## eReferences

1. Anderson LJ, Schnipper JL, Nuckols TK, et al. A systematic overview of systematic reviews evaluating interventions addressing polypharmacy. *American Journal of Health-System Pharmacy*. 2019;76(21):1777-1787.
2. The World Bank Group. World Bank Country and Lending Groups. Accessed October 20, 2023, 2023. <https://datahelpdesk.worldbank.org/knowledgebase/articles/906519-world-bank-country-and-lending-groups>
