# Supplementary material for: Cumulative Update of a Systematic Overview Evaluating Interventions Addressing Polypharmacy
Source: PubMed Central journal article supplement (PMC10782233; doi:10.1001/jamanetworkopen.2023.50963), 2024-01-10
Supplement: jamanetwopen-e2350963-s002.pdf [file jamanetwopen-e2350963-s002.pdf]

## Data Sharing Statement

Keller. Cumulative Update of a Systematic Overview Evaluating Interventions Addressing Polypharmacy. *JAMA Netw Open*. Published January 10, 2024.

doi:10.1001/jamanetworkopen.2023.50963

### Data

**Data available:** No

### Additional Information

**Explanation for why data not available:** All of the extracted data is in the manuscript tables.
